# Supplementary material
Source: Frontiers journal article supplement (https://www.frontiersin.org/articles/434471)
Supplement: Table_5.DOCX [file Table_5.DOCX]

**Table S5**. Analysis of molecular variance (AMOVA) using specimens of *Phymatolithon calcareum* genotyped for eight microsatellite loci. A) AMOVA calculated using the whole data set and B) using only the distinct genets. The partition of genetic variance was calculated within individuals, within sites, between sites within estuaries and among estuaries using sites sampled in three estuaries in Galicia (Ría de Arousa, Ría de Pontevedra and Ría de Vigo). The populations from the Ría de Muros e Noia (San Francisco and Bornalle) were not included since only three specimens of *Phymatolithon calcareum* were sampled in San Francisco (i.e. outer-zone). Significance was tested through 1000 permutations.

1. Ramets data set, global *FST* = 0.32336 (*P*-value < 0.000001).

| **Source of Variation** | **Sum of squares** | **Variance components** | **% variation** | **F-statistic** | ***P*-value** |
| --- | --- | --- | --- | --- | --- |
| Among estuaries | 138.876 | 0.40079 | 18.89 | *FCT* = 0.18894 | 0.13587 |
| Among sites within estuaries | 49.101 | 0.29076 | 13.71 | *FSC* = 0.16901 | < 0.000001 |
| Among individuals within sites | 218.472 | -0.33731 | -15.90 | *FIS* = -0.23594 | 1.00000 |
| Within individuals | 364.000 | 1.76699 | 83.30 | *FIT* = 0.16700 | 0.01271 |
| Total | 770.449 | 2.12123 | 100% |  |  |

1. Genets data set, global *FST* = 0.22713 (*P*-value < 0.000001).

| **Source of Variation** | **Sum of squares** | **Variance components** | **% variation** | **F-statistic** | ***P*-value** |
| --- | --- | --- | --- | --- | --- |
| Among estuaries | 43.793 | 0.35577 | 15.72 | *FCT* = 0.15723 | 0.13196 |
| Among sites within estuaries | 12.803 | 0.16011 | 7.08 | *FSC* = 0.08396 | 0.00098 |
| Among individuals within sites | 110.834 | -0.04180 | -1.85 | *FIS* = -0.02393 | 0.66667 |
| Within individuals | 127.000 | 1.78873 | 79.05 | *FIT* = 0.20951 | 0.00098 |
| Total | 294.430 | 2.26281 | 100% |  |  |
